# Supplementary material for: Evaluation of the bacterial ocular surface microbiome in ophthalmologically normal dogs prior to and following treatment with topical neomycin-polymyxin-bacitracin
Source: PubMed Central journal article supplement (PMC7282667; doi:10.1371/journal.pone.0234313), 2020-06-09
Supplement: pone.0234313.s001.pdf [file pone.0234313.s001.pdf]

**Canine Ocular Microbiome Project**

|            |                       |
|------------|-----------------------|
| Patient ID | Clinician Information |
|------------|-----------------------|

- COMPLETE OPHTHALMIC EXAM AND CONJUNCTIVAL SWABS (05/21/18)
- REPEAT CONJUNCTIVAL SWABS (05/28/18 @ 8am) \*Return Treatment Sheet\*
- REPEAT CONJUNCTIVAL SWABS (06/25/18 @ 8am)

**TREATMENT SHEET**

**NeoPolyBac: Give a ¼ inch strip in the RIGHT EYE three times daily for 1 week.**

|                 | Morning/Before Work                | Afternoon/After Work                | Evening/Before Bed       |
|-----------------|------------------------------------|-------------------------------------|--------------------------|
| <b>05/21/18</b> |                                    | <input type="checkbox"/> First dose | <input type="checkbox"/> |
| <b>05/22/18</b> | <input type="checkbox"/>           | <input type="checkbox"/>            | <input type="checkbox"/> |
| <b>05/23/18</b> | <input type="checkbox"/>           | <input type="checkbox"/>            | <input type="checkbox"/> |
| <b>05/24/18</b> | <input type="checkbox"/>           | <input type="checkbox"/>            | <input type="checkbox"/> |
| <b>05/25/18</b> | <input type="checkbox"/>           | <input type="checkbox"/>            | <input type="checkbox"/> |
| <b>05/26/18</b> | <input type="checkbox"/>           | <input type="checkbox"/>            | <input type="checkbox"/> |
| <b>05/27/18</b> | <input type="checkbox"/>           | <input type="checkbox"/>            | <input type="checkbox"/> |
| <b>05/28/18</b> | <input type="checkbox"/> Last dose |                                     |                          |

**COMMENTS**

|  |
|--|
|  |
|  |
|  |
|  |
|  |

Investigator Signature: \_\_\_\_\_

Date: \_\_\_\_\_
